# Supplementary material for: Twenty Years of Advancements in a Radiotherapy Facility: Clinical Protocols, Technology, and Management
Source: MDPI journal article supplement (doi:10.3390/curroncol30070510), 2023-07-22
Supplement: s1 [file s1]

# Supplementary Material

Table S1. List of abbreviations

| Abbreviation | Definition                            | Explanation                                                                                                                                                                                                                        |
|--------------|---------------------------------------|------------------------------------------------------------------------------------------------------------------------------------------------------------------------------------------------------------------------------------|
| 3D CRT       | 3D conformal radiotherapy             | radiotherapy technique using static or rotating beams without beam modulation, unable to provide non convex target conformality                                                                                                    |
| 6DOF         | Six degrees of Freedom Couch          | positioning device used in radiotherapy that allows the patient to be moved in six different directions translation for x, y, and z axes, and rotations: couch table, pitch and roll movements                                     |
| CBCT         | Cone-Beam Computed Tomography         | imaging technique used in radiotherapy to obtain tomographic 3D images with a cone-shaped X-ray beam                                                                                                                               |
| DPW          | Daily Patient Workload                | number of patients treated on a daily basis in the department                                                                                                                                                                      |
| DPLW         | Daily Patient Linac Workload          | number of patients treated on a daily basis per single linac                                                                                                                                                                       |
| FF           | Flattening Filter                     | component of the linear accelerator used in radiotherapy that helps to evenly distribute the radiation beam                                                                                                                        |
| FFF          | Flattening Filter Free                | radiotherapy technique that eliminates the use of the flattening filter in the linear accelerator                                                                                                                                  |
| Gy           | Gray                                  | unit used to measure the absorbed dose of radiation. It represents the amount of energy (in joules) deposited per unit mass (in kilograms) of tissue                                                                               |
| IGRT         | Image Guided Radiotherapy             | radiotherapy technique that utilizes imaging technology, such as CBCT, to accurately guide and adjust the radiation treatment based on the patient's anatomy and tumor position                                                    |
| IMRT         | Intensity Modulated Radiation Therapy | technique developed to deliver radiation doses with varying intensity levels achieved by modulating of the radiation beam                                                                                                          |
| NOF          | Number of fractions                   | total number of fractions in a therapy course                                                                                                                                                                                      |
| NPY          | New Patient per Year                  | number of newly diagnosed patients who begin receiving radiotherapy treatment in a given year                                                                                                                                      |
| OIS          | Oncology Information System           | specialized software system used in oncology departments to manage and organize patient information, treatment planning, scheduling, and other aspects of cancer care. It is an evolution of a R&V system                          |
| QA           | Quality Assurance                     | procedures implemented to ensure that the radiotherapy equipment, treatment plans, and delivery are accurate and adhere to established standards and protocols.                                                                    |
| R&V          | Record and Verify System              | specialized software that captures, stores, and verifies critical information related to radiation treatment. It records details such as patient data, treatment plans, machine settings, and actual treatment delivery parameters |
| RT           | Radiotherapy                          | medical treatment that utilizes high-energy radiation, such as X-rays or gamma rays, to target and destroy cancer cells or shrink tumors                                                                                           |

---

|             |                             |                                                                                                                                        |
|-------------|-----------------------------|----------------------------------------------------------------------------------------------------------------------------------------|
| <b>SGRT</b> | Surface Guided Radiotherapy | Technique using real-time monitoring of the patient's body surface to ensure accurate radiation delivery in radiotherapy               |
| <b>TS</b>   | Technology Score            | metric designed to characterize the technological advancement of a linear accelerator                                                  |
| <b>VMAT</b> | Volumetric Arc Radiotherapy | radiotherapy technique that uses a rotating gantry to deliver radiation in a continuous arc while dynamically modulating its intensity |
| <b>WD</b>   | Working Days                | days in a year available for work, excluding weekends and public holidays                                                              |
| <b>WS8</b>  | 8-hours Work Shift          | standard full-time work period of 8 consecutive hours                                                                                  |

---
